1 **Covariates of success in quitting smoking in the community and**  
2 **secondary acute or mental health care services: a rapid systematic**  
3 **review**

4

5 Emma S. Hock PhD, Matthew Franklin PhD, Susan Baxter PhD, Mark Clowes MSc, Jim Chilcott  
6 PhD, and Duncan Gillespie PhD\*

7 School of Health and Related Research, The University of Sheffield, UK

8 \* Corresponding author: Duncan Gillespie [duncan.gillespie@sheffield.ac.uk](mailto:duncan.gillespie@sheffield.ac.uk)

9 ORCID number for Duncan Gillespie: 0000-0003-3450-5747

10

11 Word count (excl. abstract, tables, fig legends): 4,884

12 Tables: 0, Figures: 2

13 Supplementary Information: PRISMA checklist & PRISMA abstract checklist

14 Supplement 1 – search strategies in full

15 Supplement 2 – results tables

16 - Supplementary Table S1: Studies excluded at full text screening

17 - Supplementary Table S2. Characteristics of included studies.

18 - Supplementary Table S3: Participant baseline characteristics of included studies

19 - Supplementary Table S4: Outcome measurement and analyses in included studies

20 - Supplementary Table S5. Relationships between covariates and quit success.

21 - Supplementary Table S6: Covariates of quitting outcomes – full results summary

22

23 **Keywords:** smoking cessation, hospital, tobacco dependence, service evaluation

24 **Short title:** smoking cessation in secondary care

1

## 1 ABSTRACT

2 **Objectives:** To identify a comprehensive set of variables associated with quitting success among  
3 tobacco smokers contacting secondary healthcare services in the United Kingdom (UK) who are  
4 offered support to quit smoking and subsequently set a quit date.

5 **Design:** Rapid systematic literature review of five electronic databases.

6 **Setting:** Studies eligible for inclusion investigated quitting success in one of three contexts: (a) the  
7 general population in the UK; (b) people with a mental health condition; (c) quit attempts initiated  
8 within a secondary care setting.

9 **Interventions:** Smoking cessation intervention in a secondary care setting.

10 **Primary and secondary outcome measures:** Parameters from statistical analysis showing the  
11 effects of covariates on quitting success with a statistically significant (i.e., p-value <0.05)  
12 association.

13 **Results:** The review identified 29 relevant studies and 14 covariates of quitting success, which we  
14 grouped into four categories: demographics (age; sex; ethnicity; socio-economic conditions;  
15 relationship status, cohabitation and social network), individual health status and healthcare setting  
16 (physical health, mental health), tobacco smoking variables (current tobacco consumption, smoking  
17 history, nicotine dependence; motivation to quit; quitting history), and intervention characteristics  
18 (reduction in amount smoked prior to quitting, the nature of behavioural support, tobacco  
19 dependence treatment duration, pharmacological aids).

20 **Conclusions:** Fourteen data fields were identified that should be considered for inclusion in datasets  
21 and statistical analysis plans for evaluating the quitting outcomes of smoking cessation interventions  
22 initiated in secondary care contexts in the UK.

23 **Trial registration:** PROSPERO CRD42021254551

24

## 1 **STRENGTHS AND LIMITATIONS OF THIS STUDY**

2       • The strengths of this review lie in the rapid but systematic approach taken and in the design  
3       of the research question and population restrictions to identify data fields important to  
4       consider in plans for the statistical analysis of the quitting outcomes of smoking cessation  
5       interventions initiated in secondary care contexts in the UK.

6       • The limitations lie in the compromises made as part of the rapid review approach, for  
7       example, our focus only on studies published in English, not searching grey literature, limited  
8       critical appraisal of the studies found.

9

10

## 1 INTRODUCTION

2 Smoking cessation is increasingly being incorporated as a systematic and opt-out component of  
3 secondary healthcare services in the United Kingdom's (UK's) National Health Service (NHS),  
4 driven by a commitment to do so in the NHS's Long Term Plan.<sup>1-3</sup> The general specification of the  
5 service pathway in acute inpatient settings is: (i) on admission, determine if the patient smokes; (ii)  
6 provide advice and treatment to support patient smokers not to smoke whilst in hospital; (iii) provide  
7 follow-up support after discharge from hospital to support the patient to quit smoking completely.  
8 This service pathway is based on the "Ottawa Model", following the early implementation of a  
9 hospital based tobacco dependence treatment service in Ottawa, Canada,<sup>4</sup> and subsequent  
10 implementation in the UK by the CURE service in Greater Manchester.<sup>5</sup> An evaluation framework  
11 for hospital based smoking cessation services in the UK was developed by consensus among UK  
12 stakeholders in acute and mental health NHS hospital Trusts,<sup>6</sup> and provides a guide to the key data  
13 fields to collect for service monitoring and evaluation. However, there is no specific guidance on  
14 what data fields might be important when undertaking "deep dives" into the data to investigate  
15 factors that might influence quitting success, which in this review we generically group under the  
16 term 'covariates' of quitting success. Without a comprehensive list of potentially influential  
17 covariates, there is a risk that important data fields might be omitted from the routine collection of  
18 service data or from statistical analyses that aim to investigate quitting outcomes.

19  
20 The current best evidence on the covariates of tobacco smoking quit success comes from a  
21 systematic review by Vangeli et al.,<sup>7</sup> which examined worldwide evidence among the adult general  
22 population. The evidence presented by Vangeli et al. highlighted decreased quit success among  
23 smokers with higher nicotine dependence, smokers who smoked more cigarettes smoked each day,  
24 smokers who had made a previously unsuccessful quit attempt, and smokers who had not previously

1 gone without smoking for a week or more. Older age and higher socio-economic status or income  
2 were also found by the review to be associated with higher quit success. However, there could also  
3 be factors specific to patient health, healthcare setting, and the features of smoking cessation  
4 interventions initiated in secondary care settings that Vangeli et al's review of factors in the general  
5 population did not include. For example, in the British Thoracic Society's national audits of smoking  
6 and smoking cessation intervention activities in acute NHS hospital Trusts,<sup>8-10</sup> the key characteristics  
7 that were used to describe variation in whether current smokers received care for their tobacco  
8 dependence were gender, age, consultant speciality, and the patients' route of contact with the  
9 secondary care service (elective / emergency).

10

11 This review was designed to support the evaluation of smoking cessation services in secondary care  
12 settings in the UK by identifying covariates worth considering in plans for the statistical analysis of  
13 quit success following contact with such a service. The review was based on the question: 'What  
14 patient-, service- and setting-related factors influence the success of a quit attempt, including when  
15 initiated in a secondary care setting?' The populations of most interest were the UK and Canada,  
16 given that the Canadian Ottawa model is the exemplar for UK services. The review question and  
17 population restrictions aimed to capture covariates of quitting success relevant to the UK general  
18 population, relevant to people with a mental health condition in any setting and in any country, and  
19 relevant to care for tobacco dependence initiated within a secondary acute or mental health service in  
20 any country. Within each study identified, the sign of the statistical coefficient for each variable  
21 investigated was taken as a measure of the direction of its association with quitting success, and the  
22 statistical significance of that coefficient at the 95% level was used to indicate if the association was  
23 potentially identified by chance or not.

24

## 1 **METHODS**

2 We undertook a rapid systematic review of studies that used a statistical model to explore what  
3 covariates are associated with quitting success. We followed the rapid review approach  
4 recommended by Tricco et al.<sup>11 12</sup>: searching more than one database in one iteration, published  
5 literature, searches limited by date and language, research scope specified by two researchers and a  
6 health librarian, and study selection and data abstraction by one reviewer and one verifier. Quality  
7 appraisal of studies was based on whether the reporting of statistical analysis was sufficient to  
8 provide estimates of the coefficient for each variable investigated and its statistical significance at the  
9 95% level. This rapid review approach aimed to produce a synthesis of available knowledge that was  
10 sufficient to meet the review's aim more quickly, ensuring logistical feasibility alongside restricted  
11 timelines, while minimising risk of bias.<sup>11 13</sup> The protocol is registered as PROSPERO  
12 CRD42021254551. Reporting follows PRISMA principles (<http://www.prisma-statement.org/>) (see  
13 the Online Supplement).

14

### 15 **Definition of covariates, effect size, and statistical significance**

16 We defined a covariate of quitting success (that we term a 'factor') as any independent variable that  
17 can strengthen, diminish, negate, or otherwise alter the association between independent and  
18 dependent variables (in this study, the dependent variables quantify success in quitting smoking).<sup>14</sup>

19

20 As the dependent variable is binary (i.e., quit achieved or not by a particular time after initiating the  
21 quit attempt), we assumed that the most common statistical analysis conducted would be a form of  
22 logistic regression with effect sizes presented as odds-ratios (ORs) or unconverted beta coefficients.  
23 For descriptive purposes, when discussing effect sizes we use the following terminology whereby the  
24 binary 'outcome' is quitting success<sup>15</sup>:

- 1 • ‘Equal odds’ when  $OR=1$ ; i.e., exposure does not affect odds of outcome
- 2 • ‘Higher odds’ when  $OR>1$ ; i.e., exposure associated with higher odds of outcome
- 3 • ‘Lower odds’ when  $OR<1$ ; i.e., exposure associated with lower odds of outcome

4 In keeping with the review’s aim to identify a list of potentially important covariates of quitting  
5 success, we focused on identifying which covariates have been estimated to have a statistically  
6 significant relationship with quitting success (with statistical significance defined as  $p < 0.05$ ) rather  
7 than focussing on effect size magnitude. We define ‘no relationship’ as meaning that a covariate did  
8 not have a statistically significant relationship with quit success (i.e.,  $p \geq 0.05$ ). We did not consider  
9 whether a relationship is causal or not, as we were interested only in association. If a study presented  
10 both univariate and multivariate analyses, we based the identification of important covariates on the  
11 multivariate analysis as this adjusts for the associations of other variables with quitting success.

12

### 13 **Eligibility criteria**

14 Inclusion was restricted to studies published in peer-reviewed journals, in English, and dating from  
15 2008, the year of the National Institute of Health and Care Excellence Guidance PH10 (for England  
16 and Wales), in which Recommendation 8 stated that smoking cessation advice and support should be  
17 available in secondary care settings for everyone who smokes. Reviews were not included, but we  
18 checked references for any relevant studies. We included studies that presented statistical estimates  
19 of the effects of covariates on the success of a quit attempt.

20

21 We searched for studies statistically assessing quit attempts in three contexts: (a) the general  
22 population instigated in any setting within the UK; (b) people with a mental health condition  
23 instigated in any setting and in any country; (c) initiated within a secondary acute or mental health

1 service in any country. The scope of (a) was limited to the UK for relevance and feasibility given the  
2 large number of studies worldwide.

3

#### 4 **Information sources**

5 Searches were conducted in April 2021. A focused search strategy combining free-text terms with  
6 subject headings (e.g., MeSH) was run and translated for optimal effectiveness across the following  
7 databases: MEDLINE (including In-Process and Epub ahead of print); EMBASE; PsycINFO (all via  
8 Ovid); CINAHL (via EBSCO) and the Cochrane Library.

9

#### 10 **Search process**

11 The search strategy was constructed around the facets of: Smoking cessation AND quitting success  
12 AND (UK OR mental health OR hospital setting). Due to the time-constrained nature of this review,  
13 searches prioritised specificity over sensitivity, but to mitigate the risk of missing relevant papers the  
14 strategy was validated against six studies already known by the authors to be potentially relevant: Le  
15 Grande et al.,<sup>16</sup> Lubitz et al.,<sup>17</sup> Ussher et al.,<sup>18</sup> Smit et al.,<sup>19</sup> Vangeli et al.,<sup>7</sup> and Zhou et al.<sup>20</sup> All six  
16 studies were retrieved by the search (see the Online Supplement). Database search results were  
17 extracted directly to reference management software.

18

#### 19 **Study selection**

20 Screening for studies relevant to each of our three contexts (a–c) was performed simultaneously,  
21 with included studies marked for relevance to each. Titles and abstracts were screened by one of  
22 three reviewers (EH, MF or SB); 70% of abstracts were checked by another reviewer (EH or MF).



1 Full texts were assessed for inclusion by one reviewer and checked by another reviewer (EH or MF).

2 Disagreements were resolved through discussion, with no need to involve a third reviewer.

3

#### 4 **Data extraction and synthesis**

5 EH and MF designed and tested a spreadsheet for data extraction. Data were extracted and charted

6 by EH and checked in regular meetings with MF and DG. The following data items were extracted:

7 Reference information (first author and date), study type, country, setting (e.g., hospital

8 type/department/ward), participant baseline characteristics (e.g., age, sex, socio-economic status,

9 reason for admission, cigarettes/day smoked, number of previous quit attempts, nicotine

10 dependence), measure of quit success (point prevalence abstinence or continuous abstinence, any

11 time point but recorded separately per time-point). Relevant characteristics of the analysis were

12 noted. For example, method of data collection, sample size, time horizon, cessation time-point,

13 measure of abstinence, whether ORs and model coefficients were captured, the model type, and

14 whether a univariate or multivariate model. Detailed statistical results were also extracted: the whole

15 model, where reported, including intercept and other coefficients, dependent and independent

16 variable, any reported *p*-values, and goodness of fit statistics, if reported.

17

18 During the data extraction process, we began to develop an organisational framework by categorising

19 studies according to our three contexts, the covariates investigated and their effects on quit success.

20 The organisational framework was then revised as results synthesis progressed. Covariates were

21 grouped according to our final organisational framework.

22

# 1 RESULTS

2 From 2,499 retrieved records, 29 studies were included in the synthesis (**Error! Reference source**  
3 **not found.**), representing 21 studies relating to the UK general population context, six studies  
4 relating to mental health in the UK or Canada, and two studies relating to secondary care in the UK  
5 or Canada. A list of excluded studies with reasons is available in Supplementary Table S1.

6

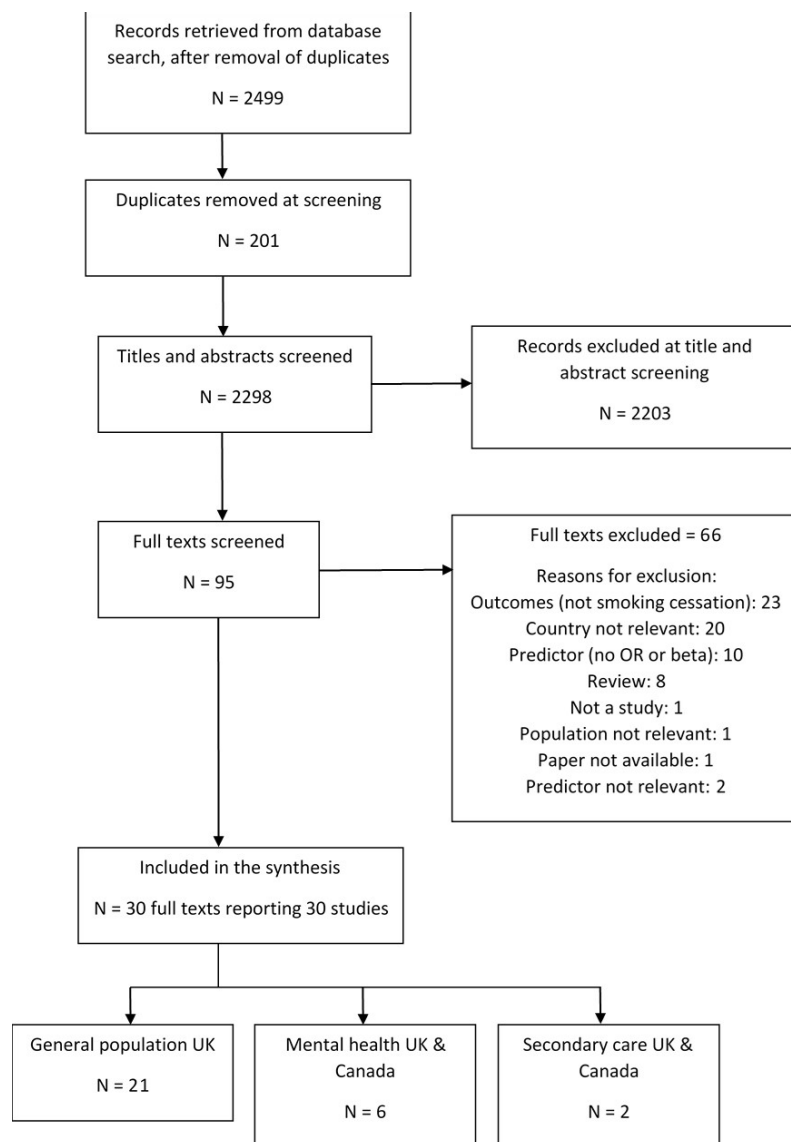

7

8 Figure 1. PRISMA flow diagram of study inclusion.

1

## 2 **Description of included studies**

3 The characteristics of the included studies are summarised in Supplementary **Error! Reference**  
4 **source not found.**; Supplementary Table S3 shows study participants characteristics. Most studies  
5 had prospective, cross-sectional or retrospective designs; three studies were randomised controlled  
6 trials (RCTs).

7

## 8 **Methodological differences between studies**

9 Methodological differences are reported in Supplementary Table S4. Smoking cessation was  
10 assessed in a variety of different ways across studies. The time horizon for reporting smoking  
11 abstinence following a quit attempt ranged from 2 weeks to 1 year. Abstinence was assessed as both  
12 point-prevalent and continuous, both by self-report (most frequently used for continuous abstinence)  
13 and validated by expired air carbon monoxide (CO; most frequently used to verify 7-day or 2-week  
14 point-prevalent abstinence, at  $\leq 10$  or  $\leq 8$  ppm). If a study conducted separate analyses for different  
15 durations of abstinence following a quit attempt, we reported the findings from each analysis  
16 independently. All studies reported odds-ratios from a logistic regression, and two studies reported  
17 beta coefficients.

18

19 In terms of sample, the majority of UK studies were of the general population (15 studies) or  
20 community smoking cessation services (four studies), with three studies examining samples with  
21 specific characteristics (i.e., pregnant women, people aged 25–59 years, and English residents of  
22 Bangladeshi origin; see Supplementary Table S3). Mental health population studies were from  
23 Canada and sampled from people attending community mental health services (four studies) or from

1 the general population (two studies). The two secondary care studies recruited participants from a  
2 Canadian hospital-based smoking cessation clinic or UK cardiac rehabilitation setting data.

3

#### 4 **Covariates of success in quitting tobacco smoking**

5 Figure 2 summarises the covariates that had a statistically significant relationship with quit attempt  
6 success. Supplementary Table S5 summarises the relationships between covariates and quit success.

7 Supplementary Table S6 provides a full description of the size and direction of covariate effects and  
8 the corresponding statistical significance.

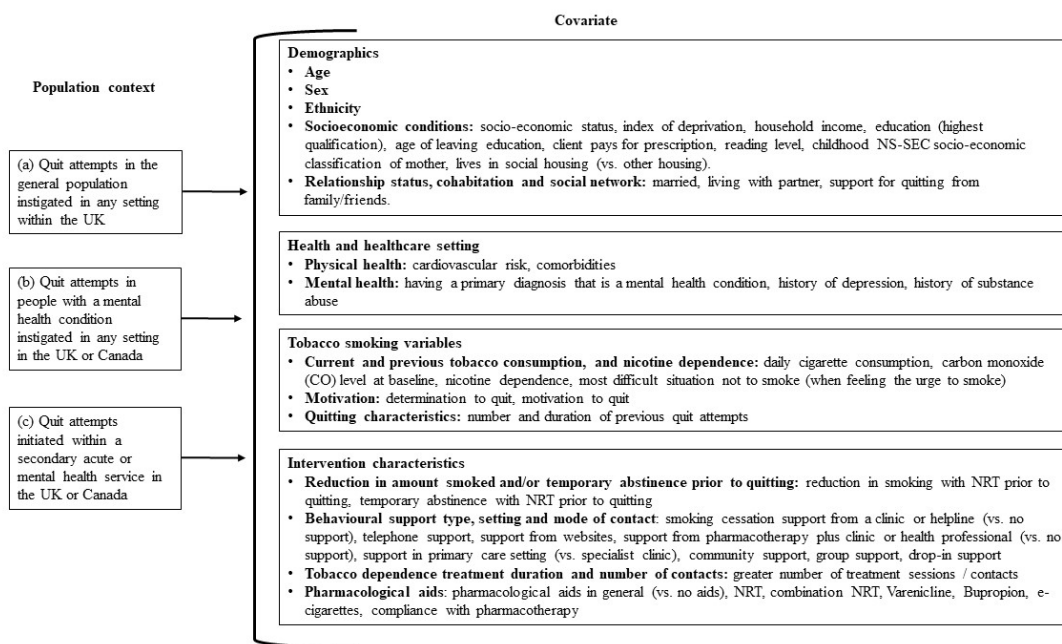

9

10 Figure 2. List of covariates found to have a statistically significant association with quitting success  
11 in at least one study. Supplementary Table S6 provides a full description of the size and direction of  
12 covariate effects and the corresponding statistical significance.

1

## 2 *Demographics*

3 Overall, 16 studies included demographic covariates; the factors related to quit outcome were age,  
4 sex, ethnicity, socioeconomic conditions, smoker's relationship status, cohabitation and social  
5 network situation (Supplementary Table S5; Supplementary Table S6).

6

7 *Age.* All studies showed higher odds (i.e., of quit success) with increasing age.<sup>21-25</sup> Six analyses  
8 reported in five papers found no relationship between age and quit success in the UK general  
9 population,<sup>26-30</sup> two studies found no relationship for age in people with mental health conditions,<sup>31</sup>  
10 <sup>32</sup> and two studies found no relationship in a secondary care setting.<sup>33 34</sup>

11

12 *Sex.* There were inconsistent findings for sex: in the UK general population, three studies reported  
13 higher odds of quitting success for males<sup>21 23 28</sup> and two studies reported higher odds of quitting  
14 success for females.<sup>24 26</sup> Two studies in an outpatient setting (cardiology and mental health services)  
15 found higher odds of quitting success in males.<sup>33 35</sup> Six studies found no relationship between sex  
16 and quitting success in the UK general population,<sup>22 25 27 29 30 36</sup> and two studies found no relationship  
17 in people with mental health conditions.<sup>31 32</sup>

18

19 *Ethnicity.* One study reported higher odds of quitting success for Black ethnicity vs. White British  
20 ethnicity.<sup>23</sup> One study reported no relationship between ethnicity and quitting success in the UK  
21 general population.<sup>29</sup>

22

23 *Socioeconomic characteristics.* There was a varied definition of socioeconomic characteristics in the  
24 studies identified. Higher odds of quitting success were reported for people: with higher social  
25 grades<sup>23 27-29 37</sup>; living in less deprived areas<sup>25</sup>; have higher income<sup>36 38</sup>; higher occupational grades<sup>21</sup>

1 <sup>38</sup>; more education<sup>26 38</sup>; who paid for prescriptions vs. were exempt<sup>21 22</sup>; had a higher reading level<sup>29</sup>;  
2 people whose mothers worked in higher grade occupations during their childhood<sup>38</sup>; and people who  
3 did not live in social housing<sup>39</sup>. In the UK general population, one study reported no relationship  
4 between quitting success and the geographic Index of Multiple Deprivation (IMD) score for the  
5 location of the smoking cessation service,<sup>21</sup> five studies reported no relationship between quitting  
6 success and education,<sup>24 26 29 36 38</sup> one study for prescription exemption status,<sup>24</sup> and one study for  
7 employment status.<sup>24</sup> In a secondary care setting, two studies reported no relationship between  
8 quitting success and the employment status of patients.<sup>33 34</sup>

9

10 *Relationship status, cohabitation and social network.* A study in the UK general population found  
11 higher odds of quitting success for people who were single, divorced or separated vs. were married  
12 or living with a partner<sup>24</sup>. However, a study of patients in care for cardiac rehabilitation found higher  
13 odds of quitting success for people who were married vs. single<sup>34</sup>. In the UK general population,  
14 studies reported finding no relationship between quitting success and marital status,<sup>29</sup> cohabitation  
15 status,<sup>38</sup> or number of household smokers.<sup>23 24</sup> One study of people with severe and persistent mental  
16 illness reported higher odds of quitting success for people with more social support for quitting from  
17 family/friends.<sup>31</sup>

18

### 19 *Health and healthcare setting*

20 There were eight studies that investigated the association between quitting success and the smoker's  
21 health or the healthcare setting in which the quit attempt was instigated; five reported covariates that  
22 had statistically significant relationships to quitting success (Supplementary Table S5;  
23 Supplementary Table S6): level of cardiovascular risk; number of comorbidities; having a mental  
24 health diagnosis; having a history of depression; having a history of substance abuse.

25

1 *Physical health.* One study in an outpatient setting reported higher odds of quitting success for  
2 patients with low (vs. moderate or high) cardiovascular risk and patients with fewer comorbidities.<sup>34</sup>  
3 However, no relationship was found between quitting success and moderate (vs. high) cardiovascular  
4 risk.<sup>34</sup> Another study found no relationship between quitting success and the number of  
5 comorbidities that a patient had.<sup>33</sup> One study reported no relationship between the clinical setting in  
6 which the patient was located at the time that they were referred to stop smoking support (Cardiology  
7 services/clinics vs. Respiriology services/clinics vs. other hospital services/clinics).<sup>33</sup>

8  
9 *Mental health.* Lower odds of quitting success were reported for people with: a primary diagnosis of  
10 anxiety disorder vs. no disorder<sup>32</sup>; recurrent, current or recent depression vs. no history of  
11 depression<sup>40</sup>; history of opiate abuse vs. history of alcohol abuse<sup>32</sup>; history of alcohol abuse, opiate  
12 abuse and marijuana abuse vs. no history of substance abuse.<sup>41</sup> No relationship with quitting success  
13 was reported in three studies that investigated primary mental health diagnosis,<sup>31 35 41</sup> two studies of  
14 PHQ-9 score,<sup>31 42</sup> one study of having a history of substance abuse,<sup>31</sup> one study of HADS anxiety  
15 score and HADS depression score,<sup>34</sup> and one study of history of psychiatric disorder and history of  
16 co-occurring substance use and psychiatric disorder.<sup>33</sup>

#### 17 18 *Tobacco smoking variables*

19 There were 17 studies in this category; 14 reported factors significantly related to quitting success  
20 (Supplementary Table S5; Supplementary Table S6): daily cigarette consumption, carbon monoxide  
21 (CO) level at baseline, level of nicotine dependence, the most difficult situation not to smoke,  
22 determination / motivation to quit, and the history of previous attempts to quit smoking.

23  
24 *Current and previous cigarette consumption.* Higher odds of pregnant women quitting smoking  
25 successfully were reported among women with lower pre-pregnancy cigarette consumption.<sup>38</sup> No  
15

1 relationship between quitting success and the daily cigarette consumption prior to quitting was  
2 identified in one study in the UK general population,<sup>28</sup> two studies of people with a mental health  
3 condition<sup>31 32</sup> and one study in a secondary care setting.<sup>33</sup> No relationship between quitting success  
4 and the age at which someone started to smoke regularly (age at smoking initiation) was reported by  
5 one study in the UK general population,<sup>29</sup> two studies in people with a mental health condition,<sup>31 32</sup>  
6 and one study in a secondary care setting.<sup>33</sup>

7

8 *Carbon monoxide (CO) level.* The single study to find a relationship between quitting success and  
9 CO level prior to quitting was of a tailored smoking cessation programme for individuals with  
10 substance use disorders and mental illness; lower CO levels at when the quit attempt began had  
11 higher odds of quitting success.<sup>41</sup> No relationship between quitting success and CO level was found  
12 by one study in people with a mental health condition,<sup>32</sup> and one study in a secondary care setting.<sup>33</sup>

13

14 *Level of nicotine dependence.* The 11 studies which identified statistically significant associations  
15 between quitting success and nicotine dependence prior to the quit attempt found mixed results:  
16 higher odds of quitting in smokers with lower nicotine dependence was found by nine studies in the  
17 UK general population<sup>21 24-29 36 43</sup> and two studies of smoking cessation delivered in an outpatient  
18 setting.<sup>31 32</sup> No relationship between quitting success and nicotine dependence was found by one  
19 study in the UK general population,<sup>23</sup> two studies in people with a mental health condition,<sup>35 41</sup> and  
20 one study in a secondary care setting.<sup>33</sup> One study in the UK general population found higher odds of  
21 quitting success in smokers whose most difficult situation not to smoke was when feeling the urge to  
22 smoke, but the same study found no relationship with quitting success for when socialising, first  
23 thing in the morning, when angry or frustrated, when relaxing, and for ‘any other reason’.<sup>29</sup> One  
24 study found no relationship between quitting success and the reported enjoyment of smoking.<sup>27</sup>

25



1 *Motivation to quit.* Two studies in the UK general population found higher odds of quitting  
2 successfully for smokers who reported a determination to quit<sup>23</sup> or being motivated to quit.<sup>36</sup> No  
3 relationships between quitting success and reported readiness to quit were found in one study in the  
4 UK general population,<sup>29</sup> one study in people with a mental health condition,<sup>31</sup> and one study in a  
5 secondary care setting.<sup>33</sup> One UK general population study found no relationship between quitting  
6 success and the reported reasons for quitting, main advantage of quitting, or main disadvantage of  
7 quitting.<sup>29</sup>

8  
9 *Quitting characteristics.* In terms of previous quit attempts, three studies in the UK general  
10 population<sup>26 28 29</sup> and one study in a mental health setting<sup>32</sup> found higher odds of quitting successfully  
11 among smokers who had made more previous quit attempts or had previously been abstinent for  
12 longer periods. Specifically, higher odds of quitting successfully were found among those who had  
13 previously quit smoking for 3 months or more,<sup>29</sup> made  $\geq 2$  quit attempts in the past 6 months,<sup>28</sup> and  
14 had a longer duration of abstinence at the last attempt to quit.<sup>26 32</sup> Three studies in the UK general  
15 population reported no relationship between quitting success and the number or duration of previous  
16 quit attempts,<sup>24 28 44</sup> as did one study in people with a mental health condition,<sup>31</sup> and one study in an  
17 outpatient setting.<sup>33</sup> One study in a UK general population reported no relationship between success  
18 in the current quit attempt and the time since the start of the last unsuccessful quit attempt.<sup>28</sup>

19  
20 *Intervention characteristics*

21 There were 21 studies that investigated the influence on quitting success of characteristics of the  
22 attempt to quit smoking; 17 studies reported factors significantly related to the success of quit  
23 attempts (Supplementary Table S5; Supplementary Table S6). Factors related to the behaviour and  
24 choices of the individual smokers were whether smokers reduced or temporarily abstained from  
25 smoking before making a quit attempt, and various descriptors of the nature of support for the quit  
17

1 attempt. Pharmacological characteristics of the quit attempt were the type of pharmacological aid  
2 use, whether this was used alongside behavioural support, and the degree of compliance of the  
3 smoker making the quit attempt with the recommended guidelines for use of the pharmacotherapy  
4 chosen.

5

6 *Reduction in amount smoked and/or temporary abstinence before quitting.* Two studies found higher  
7 odds of quitting successfully for smokers who reduced the amount they smoked before attempting to  
8 quit smoking,<sup>28 45</sup> including if this was with the support of pharmacotherapy.<sup>45</sup> One study found no  
9 relationship between quitting success and whether the quit attempt was spontaneous, i.e. initiated as  
10 soon as the decision to quit has been made (compared with not making a spontaneous quit attempt),<sup>28</sup>  
11 and one study found no relationship between quitting success and whether the smoker reduced the  
12 amount smoked prior to quitting (compared with quitting without first reducing the amount  
13 smoked).<sup>26</sup>

14

15 *Behavioural support type, setting and mode of contact.* For the UK general population, higher odds  
16 of quitting were found for smokers who used a smoking cessation clinic and websites (compared  
17 with no support),<sup>39 46</sup> for smokers who used pharmacotherapy alongside help from a health  
18 professional or specialist smoking cessation advisor (compared with no support),<sup>46</sup> and for smokers  
19 who received support in specialist clinics,<sup>21 44</sup> in the community (compared with other settings),<sup>24 25</sup>  
20 and with group support (compared with one-to-one or other support).<sup>21 22</sup> Lower odds of quitting  
21 were reported for smokers who used drop-in support (compared with one-to-one support),<sup>44</sup> and  
22 telephone support (compared with no support).<sup>39</sup> Other studies found no relationships between  
23 quitting success and the receipt of in-person behavioural support,<sup>39</sup> the use of self-help materials,<sup>39</sup>  
24 having one-to-one support,<sup>47</sup> the setting of support for smoking cessation,<sup>21 22 25 44</sup> having group  
25 therapy, or receiving support from a doctor or other health professional.<sup>46</sup>

1

2 *Tobacco dependence treatment duration and number of contacts.* Higher odds of quitting success  
3 were associated with the number of contacts that a smoker had with a stop smoking advisor in the  
4 UK general population,<sup>23</sup> and in studies of people with a mental health condition.<sup>32 35 41</sup> Other studies  
5 found no relationship between quitting success and treatment duration or number of contacts.<sup>21 31 33</sup>

6

7 *Pharmacological aids.* In the UK general population, higher odds of quitting success were found for  
8 smokers who used NRT (compared with no NRT/no cessation aids),<sup>21 39 44</sup> combination NRT  
9 (compared with single NRT),<sup>30</sup> varenicline (compared with no varenicline, no medication, or  
10 NRT),<sup>21 25 39 44</sup> bupropion (compared with no medication and NRT),<sup>21 24</sup> and for the use of any  
11 pharmacotherapy in general.<sup>46 48</sup> There were also higher odds of quitting success with the use of e-  
12 cigarettes (compared with no e-cigarettes, no cessation aid, and NRT).<sup>36 39 47</sup> There was also evidence  
13 in the UK general population of higher odds of quitting successfully when smokers have greater  
14 compliance with the recommended guidelines for pharmacotherapy use.<sup>23</sup> One study in the UK  
15 general population found lower odds of quitting successfully for smokers who bought NRT over the  
16 counter (compared with no cessation aids).<sup>48</sup> Other studies in the UK general population found no  
17 relationships between quitting success and the use of prescription NRT,<sup>39</sup> NRT bought over the  
18 counter,<sup>39</sup> bupropion,<sup>39 44</sup> or e-cigarette use.<sup>36</sup> For people with a mental health condition, no  
19 relationship with quitting success was found for the use of pharmacotherapy,<sup>31 32 35</sup> or the number of  
20 weeks of NRT, varenicline and bupropion use.<sup>32</sup>

21

## 22 **DISCUSSION**

23 The review has identified a list of covariates worth considering in plans for the statistical analysis of  
24 quitting success following a smoking cessation intervention initiated in a secondary care setting in

1 the UK. The findings support and supplement the previous reviews that have investigated covariates  
2 of quitting success, and add to the evaluation framework for hospital based smoking cessation  
3 services in the UK<sup>6</sup> by highlighting the data fields important to consider in “deep dives” into service  
4 data to investigate the reasons for variation in quitting outcomes.

5

## 6 **Strength and limitations**

7 The strengths of this review lie in the rapid but systematic approach taken<sup>11 12</sup> and in the design of  
8 the research question and population restrictions to be specific to smoking cessation interventions  
9 initiated in a secondary care setting in the UK. The limitations lie in the compromises made as part  
10 of the rapid review approach, for example, our focus only on studies published in English, not  
11 searching grey literature, limited critical appraisal of the studies found. the review only included  
12 studies from the UK and Canada, which was intended to limit the influence of variation in service  
13 delivery internationally, while noting our interest was specific to the UK. Whilst this restriction  
14 increased relevance, only two studies were identified from a secondary healthcare setting. It is  
15 possible that expanding the search worldwide would have identified more covariates specific to  
16 understanding the influence of health and the healthcare setting on quitting success. However,  
17 healthcare systems differ widely worldwide, and our decisions to limit the scope of this review are in  
18 line with recommended best practice for rapid reviews.<sup>11 12</sup>

19

## 20 **Informing real-world data collection: supporting clinical care and public health policy**

21 Improvement of smoking cessation interventions embedded into NHS secondary care services  
22 requires the use of real-world data for service monitoring and ongoing evaluation. There will be  
23 incremental improvement in services over time, including attempts to address factors observed to  
24 influence the success of quit attempts. This review provides a starting point for understanding what

1 data fields might be important to collect to ensure that sufficient information is available to guide  
2 activities aimed at service improvement. The NICE real-world evidence framework<sup>49</sup> encourages  
3 service evaluators to identify the data fields needed through a systematic, transparent and  
4 reproducible search. The current review of the covariates of quitting success is part of that systematic  
5 approach and could aid the planning of data fields to be collected.

6

### 7 **Evidence-based care: trial-based and real-world evidence**

8 When conducting an evaluation of intervention efficacy or comparative effectiveness, be it based on  
9 a randomised or non-randomised study design (noting service evaluations are not permitted to  
10 randomise patients to treatment assignment), developing a statistical analysis plan is an important  
11 step towards reducing potential bias in the evidence base.<sup>49</sup> Service evaluations and associated real-  
12 world evidence are often dependent on the real-world data available, hence the importance of  
13 considering which covariates to collect data on. For a statistical analysis plan, the interest is usually  
14 in adjusting estimates of service outcomes for the influence of confounding variables, but  
15 investigations can become more complex by situating covariates within a causal framework for  
16 evaluating service outcomes, for example using directed acyclic graphs.<sup>49</sup> The list of covariates  
17 identified in the current review could aid the development of a range of plans for statistical analysis  
18 to inform the evidence-base, focussed either on association or causality depending on the intention of  
19 the analysis and required evidence-base.

20

### 21 **Understanding service complexity: informing adaptive logic models**

22 There is increasing recognition in real world implementation and evaluation of healthcare  
23 interventions of the complexity of even seemingly “simple” treatments. Healthcare has been  
24 described as a complex adaptive system which requires understanding of multiple elements and the

1 way in which they interact, in order to lead to transformation.<sup>50</sup> In common with many evaluations,  
2 evaluations of tobacco dependence treatment services in the UK draw on a theory of change  
3 approach in order to aid understanding of implementation and the effects of the tobacco dependence  
4 treatment service on outcomes for smoking and health.<sup>51</sup> The data fields identified during this review  
5 help to inform the development of service logic models,<sup>52</sup> which act as a visual summary of the  
6 complexity by which the intervention produces outcomes. These models can help to build our  
7 conceptualization and understanding of hypothesized causal links underpinning quitting smoking.<sup>53</sup>

8

## 9 **CONCLUSION**

10 Fourteen broad categories of covariate were identified as having a statistically significant association  
11 with the success in quitting smoking and therefore worth considering in plans for the statistical  
12 analysis of quit success following contact with a smoking cessation intervention initiated within  
13 secondary healthcare services in the UK. These covariates also indicate the data fields it might be  
14 important to collect as part of the ongoing monitoring and evaluation of such services.

15

## **FUNDING**

This study was supported by charity funding from Yorkshire Cancer Research as part of a commissioned evaluation of the QUIT hospital-based tobacco dependence treatment service (<https://sybics-quit.co.uk/>) (SA/R117), and by funds from Research England to generate knowledge to enhance the impact of this work [QR-Policy Support Fund]. Those funding the study had no involvement in its design, interpretation or the decision to submit this manuscript for publication.

## **DECLARATION OF INTERESTS**

The authors declare no conflicting interests.

## **ACKNOWLEDGEMENTS**

The review was initiated as part of a Yorkshire Cancer Research commissioned service evaluation of the QUIT hospital-based tobacco dependence treatment service (<https://sybics-quit.co.uk/>). The authors would like to thank the Programme Director of the QUIT service, Lisa Wilkins, and the teams implementing the service for their support with the QUIT service evaluation. The authors thank Debbie Robson for support in developing the review and John Holmes for comments to improve the manuscript.

For the purpose of open access, the author has applied a CC BY public copyright licence to any Author Accepted Manuscript version arising from this submission.

## **Data availability statement**

The spreadsheet containing data extracted from included studies is available on request.

## Author contributions

- Emma S. Hock: Writing – Original Draft Preparation (equal), Writing – Review & Editing (lead), Investigation - evidence searches and collation (lead)
- Matthew Franklin: Funding Acquisition (supporting), Conceptualization (lead), Writing – Review & Editing (supporting), Investigation - evidence searches and collation (supporting), Validation (equal), Project Administration (supporting), Supervision (equal)
- Susan Baxter: Funding Acquisition (supporting), Writing – Review & Editing (supporting), Investigation - evidence searches and collation (supporting)
- Mark Clowes: Methodology - designing the searches (lead)
- Jim Chilcott: Funding Acquisition (supporting), Writing – Review & Editing (supporting), Validation (equal)
- Duncan Gillespie: Funding Acquisition (lead), Writing – Original Draft Preparation (equal), Writing – Review & Editing (lead), Project Administration (lead), Supervision (equal)

## ETHICS APPROVAL

Ethics approval was not required for this review study.

## REFERENCES

1. Tobacco Advisory Group of the Royal College of Physicians. Hiding in plain sight: Treating tobacco dependency in the NHS. London: Royal College of Physicians, 2018.
2. Agrawal S, Mangera Z, Murray RL, et al. Successes and Challenges of Implementing Tobacco Dependency Treatment in Health Care Institutions in England. *Current Oncology* 2022;29(5):3738-47.



3. UK National Health Service (NHS). The NHS long term plan. <https://www.longtermplan.nhs.uk/>, 2019.
4. Reid RD, Mullen KA, Slovinec D'Angelo ME, et al. Smoking cessation for hospitalized smokers: an evaluation of the "Ottawa Model". *Nicotine Tob Res* 2010;12(1):11-8. doi: 10.1093/ntr/ntp165 [published Online First: 2009/11/12]
5. Evison M, Agrawal S, Conroy M, et al. Building the case for comprehensive hospital-based tobacco addiction services: Applying the Ottawa Model to the City of Manchester. *Lung Cancer* 2018;121:99-100. doi: 10.1016/j.lungcan.2018.04.010 [published Online First: 2018/05/10]
6. Robson D, Richardson S, Howle F, et al. Developing and testing a standardised evaluation framework for hospital-initiated tobacco dependence treatment services: Cancer Research UK, 2020.
7. Vangeli E, Stapleton J, Smit ES, et al. Predictors of attempts to stop smoking and their success in adult general population samples: a systematic review. *Addiction* 2011;106(12):2110-21. doi: 10.1111/j.1360-0443.2011.03565.x [published Online First: 2011/07/15]
8. Agrawal S, Mangera Z. British Thoracic Society smoking cessation audit report: Smoking cessation policy and practice in NHS hospitals: National audit period: 1 April–31 May 2016. *British Thoracic Society* 2016;201(6)
9. Devani N, Evison M. National Smoking Cessation Audit 2021: Management of Tobacco Dependency in Acute Care Trusts: Audit Report. National Audit Period: 1 July – 31 August 2021. *British Thoracic Society Reports* 2021;13(1)
10. Mangera Z, Devani N. National Smoking Cessation Audit 2019. National Audit Period: 1 July – 30 August 2019. *British Thoracic Society Reports* 2020;11(2)
11. Tricco AC, Antony J, Zarin W, et al. A scoping review of rapid review methods. *BMC medicine* 2015;13(1):1-15.
12. Tricco AC, Zarin W, Antony J, et al. An international survey and modified Delphi approach revealed numerous rapid review methods. *Journal of clinical epidemiology* 2016;70:61-67.
13. Abrami PC, Borokhovski E, Bernard RM, et al. Issues in conducting and disseminating brief reviews of evidence. *Evidence & Policy: A Journal of Research, Debate and Practice* 2010;6(3):371-89. doi: 10.1332/174426410X524866
14. Hefner V. The SAGE Encyclopedia of Communication Research Methods. Thousand Oaks  
Thousand Oaks, California: SAGE Publications, Inc, 2017.

15. Szumilas M. Explaining odds ratios. *J Can Acad Child Adolesc Psychiatry* 2010;19(3):227-9. [published Online First: 2010/09/16]
16. Le Grande M, Borland R, Yong H-H, et al. Predictive Power of Dependence Measures for Quitting Smoking. Findings From the 2016 to 2018 ITC Four Country Smoking and Vaping Surveys. *Nicotine & tobacco research : official journal of the Society for Research on Nicotine and Tobacco* 2021;23(2):276-85. doi: <https://dx.doi.org/10.1093/ntr/ntaa108>
17. Lubitz SF, Flitter A, Wileyto EP, et al. History and Correlates of Smoking Cessation Behaviors Among Smokers With Serious Mental Illness. *Nicotine & tobacco research : official journal of the Society for Research on Nicotine and Tobacco* 2020;22(9):1492-99. doi: <https://dx.doi.org/10.1093/ntr/ntz229>
18. Ussher M, Kakar G, Hajek P, et al. Dependence and motivation to stop smoking as predictors of success of a quit attempt among smokers seeking help to quit. *Addictive Behaviors* 2016;53:175-80. doi: <http://dx.doi.org/10.1016/j.addbeh.2015.10.020>
19. Smit ES, Hoving C, Schelleman-Offermans K, et al. Predictors of successful and unsuccessful quit attempts among smokers motivated to quit. *Addictive behaviors* 2014;39(9):1318-24. doi: 10.1016/j.addbeh.2014.04.017
20. Zhou X, Nonnemaker J, Sherrill B, et al. Attempts to quit smoking and relapse: Factors associated with success or failure from the ATTEMPT cohort study. *Addictive Behaviors* 2009;34(4):365-73. doi: <http://dx.doi.org/10.1016/j.addbeh.2008.11.013>
21. Brose LS, McEwen A, West R. Does it matter who you see to help you stop smoking? Short-term quit rates across specialist stop smoking practitioners in England. *Addiction* 2012;107(11):2029-36. doi: 10.1111/j.1360-0443.2012.03935.x
22. Brose LS, West R, Stapleton JA. Comparison of the effectiveness of varenicline and combination nicotine replacement therapy for smoking cessation in clinical practice. *Mayo Clinic proceedings* 2013;88(3):226-33. doi: <https://dx.doi.org/10.1016/j.mayocp.2012.11.013>
23. Hiscock R, Judge K, Bauld L. Social inequalities in quitting smoking: what factors mediate the relationship between socioeconomic position and smoking cessation? *Journal of public health (Oxford, England)* 2011;33(1):39-47. doi: <https://dx.doi.org/10.1093/pubmed/fdq097>
24. McEwen A, West R, McEwen A, et al. Do implementation issues influence the effectiveness of medications? The case of nicotine replacement therapy and bupropion in UK Stop Smoking Services. *BMC Public Health* 2009;9(1):28-28. doi: 10.1186/1471-2458-9-28

25. Walker N, Gainforth H, Kiparoglou V, et al. Factors moderating the relative effectiveness of varenicline and nicotine replacement therapy in clients using smoking cessation services. *Addiction* 2018;113(2):313-24. doi: 10.1111/add.14004
26. Beenstock J, Lindson-Hawley N, Aveyard P, et al. Future orientation and smoking cessation: secondary analysis of data from a smoking cessation trial. *Addiction (Abingdon, England)* 2014;109(10):1732-40. doi: <https://dx.doi.org/10.1111/add.12621>
27. Fidler JA, West R. Enjoyment of smoking and urges to smoke as predictors of attempts and success of attempts to stop smoking: a longitudinal study. *Drug and alcohol dependence* 2011;115(1-2):30-4. doi: <https://dx.doi.org/10.1016/j.drugalcdep.2010.10.009>
28. Garnett C, Shahab L, Raupach T, et al. Understanding the Association Between Spontaneous Quit Attempts and Improved Smoking Cessation Success Rates: A Population Survey in England With 6-Month Follow-up. *Nicotine & tobacco research : official journal of the Society for Research on Nicotine and Tobacco* 2020;22(9):1460-67. doi: <https://dx.doi.org/10.1093/ntr/ntz115>
29. Kale D, Gilbert HM, Sutton S. Are predictors of making a quit attempt the same as predictors of 3-month abstinence from smoking? Findings from a sample of smokers recruited for a study of computer-tailored smoking cessation advice in primary care. *Addiction (Abingdon, England)* 2015;110(10):1653-64. doi: <https://dx.doi.org/10.1111/add.12972>
30. Kassim S, Al-Haboubi M, Croucher R. Short-Term Smoking Cessation in English Resident Adults of Bangladeshi Origin: A Service Review. *Nicotine & tobacco research : official journal of the Society for Research on Nicotine and Tobacco* 2016;18(4):410-5. doi: <https://dx.doi.org/10.1093/ntr/ntv097>
31. Masuhara JE, Heah T, Okoli CTC. Outcomes of a tobacco treatment programme for individuals with severe and persistent mental illness attending a community mental health team. *Journal of Smoking Cessation* 2014;9(2):60-67. doi: <http://dx.doi.org/10.1017/jsc.2013.17>
32. Okoli CTC, Khara M. Smoking cessation outcomes and predictors among individuals with co-occurring substance use and/or psychiatric disorders. *Journal of dual diagnosis* 2014;10(1):9-18. doi: <https://dx.doi.org/10.1080/15504263.2013.866860>
33. Khara M, Okoli CTC. A retrospective review of pilot outcomes from an out-patient tobacco treatment programme within cardiology services. *Journal of Smoking Cessation* 2015;10(1):74-84. doi: <http://dx.doi.org/10.1017/jsc.2013.40>
34. Salman A, Doherty P. Predictors of Quitting Smoking in Cardiac Rehabilitation. *Journal of clinical medicine* 2020;9(8) doi: <https://dx.doi.org/10.3390/jcm9082612>

35. Selby P, Voci SC, Zawertailo LA, et al. Individualized smoking cessation treatment in an outpatient setting: Predictors of outcome in a sample with psychiatric and addictions comorbidity. *Addictive behaviors* 2010;35(9):811-7. doi: <https://dx.doi.org/10.1016/j.addbeh.2010.03.020>
36. Hitchman SC, Brose LS, Brown J, et al. Associations Between E-Cigarette Type, Frequency of Use, and Quitting Smoking: Findings From a Longitudinal Online Panel Survey in Great Britain. *Nicotine & Tobacco Research* 2015;17(10):1187-94. doi: 10.1093/ntr/ntv078
37. Kotz D, West R. Explaining the social gradient in smoking cessation: it's not in the trying, but in the succeeding. *Tobacco Control* 2009;18(1):43-46. doi: 10.1136/tc.2008.025981
38. Graham H, Hawkins SS, Law C. Lifecourse influences on women's smoking before, during and after pregnancy. *Social Science & Medicine* 2010;70(4):582-87. doi: 10.1016/j.socscimed.2009.10.041
39. Jackson SE, Kotz D, West R, et al. Moderators of real-world effectiveness of smoking cessation aids: a population study. *Addiction* 2019;114(9):1627-38. doi: 10.1111/add.14656
40. Zawertailo L, Voci S, Selby P. Depression status as a predictor of quit success in a real-world effectiveness study of nicotine replacement therapy. *Psychiatry research* 2015;226(1):120-7. doi: <https://dx.doi.org/10.1016/j.psychres.2014.12.027>
41. Okoli CT, Khara M, Torchalla I, et al. Sex differences in smoking cessation outcomes of a tailored program for individuals with substance use disorders and mental illness. *Addictive Behaviors* 2011;36(5):523-26. doi: 10.1016/j.addbeh.2010.12.029
42. Zawertailo LA, Baliunas D, Ivanova A, et al. Individualized Treatment for Tobacco Dependence in Addictions Treatment Settings: The Role of Current Depressive Symptoms on Outcomes at 3 and 6 Months. *Nicotine & tobacco research : official journal of the Society for Research on Nicotine and Tobacco* 2015;17(8):937-45. doi: <https://dx.doi.org/10.1093/ntr/ntv013>
43. Taggar JS, Lewis S, Docherty G, et al. Do cravings predict smoking cessation in smokers calling a national quit line: secondary analyses from a randomised trial for the utility of 'urges to smoke' measures. *Substance abuse treatment, prevention, and policy* 2015;10:15. doi: <https://dx.doi.org/10.1186/s13011-015-0011-8>
44. Brose LS, West R, McDermott MS, et al. What makes for an effective stop-smoking service? *Thorax* 2011;66(10):924-26. doi: 10.1136/thoraxjnl-2011-200251
45. Beard E, McNeill A, Aveyard P, et al. Association between use of nicotine replacement therapy for harm reduction and smoking cessation: a prospective study of English smokers. *Tobacco control* 2013;22(2):118-22. doi: <https://dx.doi.org/10.1136/tobaccocontrol-2011-050007>

46. Gibson JE, Murray RL, Borland R, et al. The impact of the United Kingdom's national smoking cessation strategy on quit attempts and use of cessation services: findings from the International Tobacco Control Four Country Survey. *Nicotine & Tobacco Research* 2010;12(suppl\_1):S64-71. doi: 10.1093/ntr/ntq119
47. Brown J, Beard E, Kotz D, et al. Real-world effectiveness of e-cigarettes when used to aid smoking cessation: a cross-sectional population study. *Addiction* 2014;109(9):1531-40. doi: 10.1111/add.12623
48. Kotz D, Brown J, West R. Prospective cohort study of the effectiveness of smoking cessation treatments used in the "real world". *Mayo Clinic Proceedings* 2014;89(10):1360-67. doi: 10.1016/j.mayocp.2014.07.004
49. National Institute for Health and Care Excellence (NICE). NICE real-world evidence framework. Corporate document [ECD9]. <https://www.nice.org.uk/corporate/ecd9>, 2022.
50. Khan S, Vandermorris A, Shepherd J, et al. Embracing uncertainty, managing complexity: applying complexity thinking principles to transformation efforts in healthcare systems. *BMC health services research* 2018;18(1):1-8.
51. Mills T, Lawton R, Sheard L. Advancing complexity science in healthcare research: the logic of logic models. *BMC medical research methodology* 2019;19(1):1-11.
52. Rehfuss EA, Booth A, Brereton L, et al. Towards a taxonomy of logic models in systematic reviews and health technology assessments: a priori, staged, and iterative approaches. *Research synthesis methods* 2018;9(1):13-24.
53. Anderson LM, Petticrew M, Rehfuss E, et al. Using logic models to capture complexity in systematic reviews. *Research synthesis methods* 2011;2(1):33-42.
